# Supplementary material for: Large negatively charged organic host molecules as inhibitors of endonuclease enzymes
Source: Royal Society of Chemistry journal article supplement (doi:10.1039/c4cc04805a), 2014-01-01
Supplement: c4cc04805a1.pdf [file c4cc04805a1.pdf]

## ***Supporting Information***

### **Large negatively charged organic host molecules as inhibitors of endonuclease enzymes**

Yannick Tauran,<sup>a,b</sup> Christophe Anjard,<sup>c</sup> Beomjoon Kim,<sup>b,d</sup> Moez Rhimi<sup>e</sup> and  
Anthony W. Coleman<sup>\*,a</sup>

<sup>a</sup> LMI CNRS UMR 5615, Univ. Lyon 1, Villeurbanne, F69622, France.  
Tel: +33 4 4243 1027; E-mail: antony.coleman@adm.univ-lyon 1.fr

<sup>b</sup> LIMMS/CNRS-IIS (UMI 2820), University of Tokyo, Tokyo, Japan.

<sup>c</sup> CGPhiMC UMR5534, Univ. Lyon 1, Villeurbanne, F69622

<sup>d</sup> CIRMM, Institute of Industrial Science, University of Tokyo,  
Tokyo, Japan. E-mail: bjoonkim@iis.u-tokyo.ac.jp

<sup>e</sup> INRA, UMR 1319 Micalis, F-78350 Jouy-en-Josas, France.

**Contents:**

- **Experimental details**
- **Supporting figure**

## Experimental details:

### Synthesis and characterization of calix[n]arenes

*Para*-sulphonato-calix[n]arenes have been synthesized as per the literature method of Coleman *et al* [1] and Calix[4]arene dihydroxyphosphorous acid as per the method of Markovsky and Kalchenko [2]

All the physical characteristics of the synthesized calixarenes correspond to the literature values.

### Material and reagent

Sulphated  $\beta$ -cyclodextrin has been purchased from Sigma-Aldrich and restriction enzymes and rh DNase I from Takara company.

### Synthesis and characterization of sulphated $\beta$ -cyclodextrin capped silver nanoparticles

10 mL of  $10^{-2}$  M  $\text{AgNO}_3$  solution was added to 80 mL of deionized water. To this solution, 10 mL of  $10^{-2}$  M of the sulphated  $\beta$ -cyclodextrin aqueous solutions were added as stabilizers with stirring for 30 min. And then, 44 mg of  $\text{NaBH}_4$  was added to the solution. The colloidal silver suspensions were obtained after 5 minutes.

The sulphated  $\beta$ -cyclodextrin capped silver nanoparticles were then characterized by UV-Visible Absorption assays using a 96 well titre visible spectrometer (BioTek Power Wave 340). The presence of stable silver nanoparticles has been characterized by a maximum absorbance at 400nm.

### Restriction enzymes inhibition assay for organic host molecules

100  $\mu\text{M}$  of each macrocyclic molecule  $\beta$ -CDsul, SC6 and SC8 (figure 1) have been mixed to 0.5  $\mu\text{g}$  of  $\lambda$ -DNA in a buffer at final concentration of 10mM Tris HCl pH 7.5, 50mM NaCl, 10 mM  $\text{MgCl}_2$ , 1mM DTT

The mixture was then mixed with the restriction enzymes and incubated 1 hour at 37°C.

The samples have been deposited on agarose gel 0.6% previously mixed with Ethidium bromide and run over 90 minutes at 75V. The gel was then scanned on ChemiDoc XRS system (Bio-Rad).

The digestion activity is then plotted as a matter of inhibitor concentration by quantifying the intensity of the digested bands with imageJ software.

### **Restriction enzymes inhibition assay for sulphated $\beta$ -cyclodextrin capped silver nanoparticles DNase I inhibition assay**

A part of the  $\beta$ -CDsul capped silver nanoparticles (annotated Ag\_NP\_ $\beta$ -CDsul) solution prepared according to the method described above has been dialysed overnight in DI Water, using a dialysis cassette with a cut off of 10 000 Da (Slide-A-Lyzer Dialysis Cassettes, 10K MWCO, Pierce).

Then a varying concentration (from 100nM to 100 $\mu$ M) of  $\beta$ -CDsul, Ag\_NP\_ $\beta$ -CDsul not dialysed and Ag\_NP\_ $\beta$ -CDsul dialysed have been mixed to 0.5 $\mu$ g of  $\lambda$ -DNA in a buffer at final concentration of 10mM Tris HCl pH 7.5, 50mM NaCl, 10 mM MgCl<sub>2</sub>, 1mM DTT.

The mixture was then mixed with the restriction enzymes NruI and incubated 1 hour at 37°C.

The samples have been deposited on agarose gel 0.8% previously mixed with Ethidium bromide and run over 45 minutes at 75V. The gel was then scanned on ChemiDoc XRS system (Bio-Rad).

The digestion activity is then plotted as a matter of inhibitor concentration by quantifying the intensity of the digested bands with imageJ software.

### **rh DNase I inhibition assay for organic host molecules**

The unit of rh DNase I and restriction enzymes are not equivalent. 1 unit for restriction will completely digest 1  $\mu$ g of substrate DNA in 60 minutes, while 1 unit for rh DNase I corresponds to the amount of the enzyme that increases the absorbance at 260 nm by 0.001 per minute at 25 °C, pH5.0, with calf thymus DNA as the substrate.

IC<sub>50</sub> of rh DNase I for the macrocyclic molecules cannot be determined by agarose gel electrophoresis. Kinetic has been performed to compare the inhibition effect between the molecules.

100 $\mu$ M of each macrocyclic molecules SC4 and SC8 have been mixed to 0.5 $\mu$ g of  $\lambda$ -DNA in a buffer at final concentration of 10mM Tris HCl pH 7.5, 50mM NaCl, 10 mM MgCl<sub>2</sub>, 1mM DTT

The mixture was then mixed with the rh DNase I (diluted 1000 time in the same buffer) at different incubation time of 1, 5, 10, 30 and 60 minutes, at 37°C.

The samples have been deposited on agarose gel 0.8% previously mixed with Ethidium bromide and run over 40 minutes at 75V. The gel was then scanned on ChemiDoc XRS system (Bio-Rad).

## References and Note

[1] A. W. Coleman, S. Jebors, S. Cecillon, P. Perret, D. Garin, D. Marti-Battle, and M. Moulin, *New J. Chem.*, 2008, **32**(5), 780-782 ;

[2] V. I. Kalchenko, D. M. Rudkevich, L. N. Markovskii, *Zhurnal Obshchei Khimii*, 1990, **60** (1-2), 2813-2814.

## Supporting Figures:

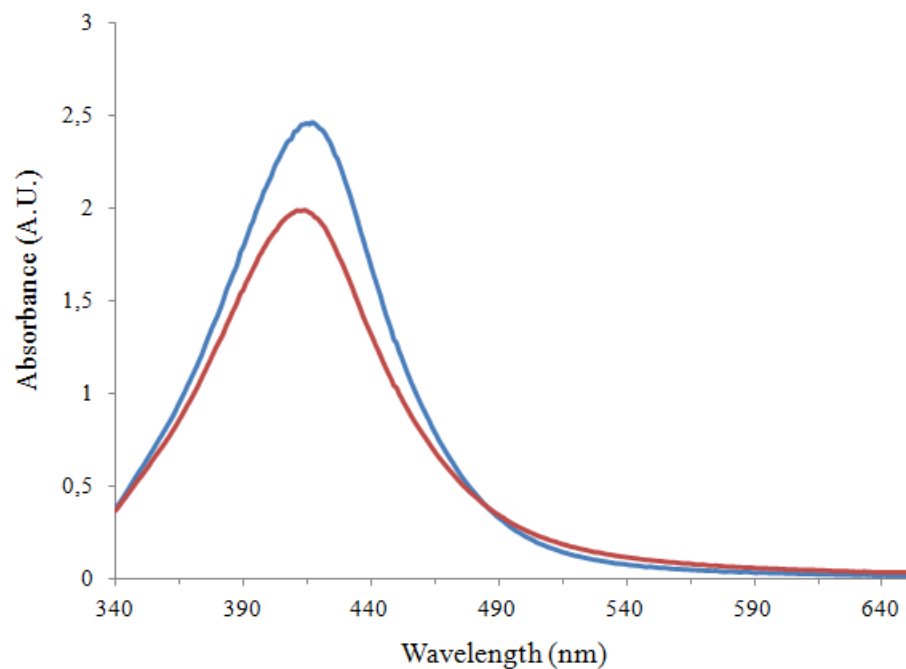

**Fig. S1** UV-Visible spectra of  $\beta$ -cyclodextrin sulphate capped silver nanoparticles. Blue curve corresponds to nanoparticles before dialysis and Red curve represents nanoparticles after dialysis. The dialysis was performed over night with a cut off of 10 000 Da against DI Water.
